# Supplementary material for: Simultaneous introduction of oxygen vacancies and Bi metal onto the {001} facet of Bi3O4Cl woven nanobelts for synergistically enhanced photocatalysis
Source: Royal Society of Chemistry journal article supplement (doi:10.1039/c8nr05322g), 2018-01-01
Supplement: c8nr05322g1.pdf [file c8nr05322g1.pdf]

**Electronic Supplementary Information for**  
**Simultaneous Introduction of Oxygen Vacancy and Bi Metal onto the {001}**  
**Facet of Bi<sub>3</sub>O<sub>4</sub>Cl Woven Nanobelts for Synergistically Enhanced**  
**Photocatalysis**

Zhihao Cui,<sup>a,b</sup> Xing'an Dong,<sup>a</sup> Yanjuan Sun,<sup>a</sup> Ying Zhou,<sup>c</sup> Yuxin Zhang,<sup>d</sup> Fan Dong<sup>a,\*</sup>

a. Chongqing Key Laboratory of Catalysis and New Environmental Materials, College of Environment and Resources, Chongqing Technology and Business University, Chongqing 400067, China. Email: dfctbu@126.com (Fan Dong)

b. School of Physics and Technology, Wuhan University, Wuhan 430072, China.

c. The Center of New Energy Materials and Technology, School of Materials Science and Engineering, Southwest Petroleum University, Chengdu 610500, China.

d. College of Materials Science and Engineering, Chongqing University, Chongqing, 400044, China.

\*Email: dfctbu@126.com (Fan Dong)

## Table of Context

|                                                                   |           |
|-------------------------------------------------------------------|-----------|
| <b>Experimental section</b> .....                                 | <b>S2</b> |
| Characterization of photocatalysts .....                          | S2        |
| <i>In situ</i> DRIFTS investigation.....                          | S2        |
| <b>Figures</b> .....                                              | <b>S4</b> |
| Figure S1. Photoluminescence spectra (PL) of BOC and BOC-30 ..... | S4        |
| <b>Tables</b> .....                                               | <b>S4</b> |
| Table S1. Specific surface areas and pore volumes .....           | S4        |
| <b>References</b> .....                                           | <b>S5</b> |

## **Experimental section:**

### **Characterization of photocatalysts**

We used X-ray diffraction (XRD) with Cu K $\alpha$  radiation (model D/max RA, Rigaku Co., Japan) to analyze the crystal phases of the samples. Surface properties were investigated by X-ray photoelectron spectroscopy (XPS) with Al K $\alpha$  X-rays (Thermo ESCALAB 250, U.S.A.). The morphology and structure of our samples were examined by scanning electron microscopy (SEM, model JSM-6490, JEOL, Japan) and transmission electron microscopy (TEM, JEM-2010, Japan). The UV-vis diffuse-reflectance spectrometry (UV-vis DRS) spectra were performed on the dry-pressed disk samples using a scanning UV-vis spectrophotometer (TU-1901, China) equipped with an integrating sphere assembly, using 100% BaSO<sub>4</sub> as the reflectance sample. Nitrogen adsorption-desorption isotherms were obtained on a nitrogen adsorption apparatus (ASAP 2020, U.S.A.) with all samples degassed at 150 °C for 4 h before measurements. Photoluminescence (PL) studies (F-7000, HITACHI, Japan) were conducted to investigate the optical properties of the samples. Steady and time-resolved fluorescence emission spectra were recorded at room temperature with a fluorescence spectrophotometer (Edinburgh Instruments, FLSP-920). Electron spin resonance (ESR) of radicals spin-trapped by 5, 5-dimethyl-1-pyrroline N-oxide (DMPO) was recorded on a JESFA200 spectrometer. Samples for ESR measurement were prepared by mixing the samples in a 40 mM DMPO solution tank (aqueous dispersion for DMPO- $\bullet$ OH and methanol dispersion for DMPO- $\bullet$ O<sup>2-</sup>) and irradiated with visible light. Electron paramagnetic resonance (EPR) measurements were carried out on a Bruker ESP 500 spectrometer.

### ***In situ* DRIFTS investigation**

We used the Tensor II FT-IR spectrometer (Bruker) equipped with an in situ diffuse reflectance cell (Harrick) to conduct in situ DRIFTS measurements. The designed reaction system has been reported in our previous paper.<sup>1,2</sup> Before the measurement, photocatalysts were put into the cell. First, the residual hydrocarbons, H<sub>2</sub>O and CO<sub>2</sub> were removed by He gas (100 mL/min). The real-time FT-IR spectrum after ventilation was utilized as background. Then, the reaction mixtures (50 mL/min NO, 50 mL/min O<sub>2</sub>) were introduced into the cell. The NO adsorption on the catalysts was carried out for 20 min. Next, photocatalysts were illuminated by a visible light source (MUA-210) for 1 hour. The real-time FTIR spectra were detected every eight minutes. Meanwhile the gas fluxes remain

constant (50 mL/min NO, 50 mL/min O<sub>2</sub>). After turning off the light, FT-IR spectra were tested every two minutes with the same gas fluxes. The IR scanning ranges were 4000-600 cm<sup>-1</sup> and 2200-700 cm<sup>-1</sup>, which were analyzed to reveal the photocatalytic oxidation process on the catalysts.

## Figures:

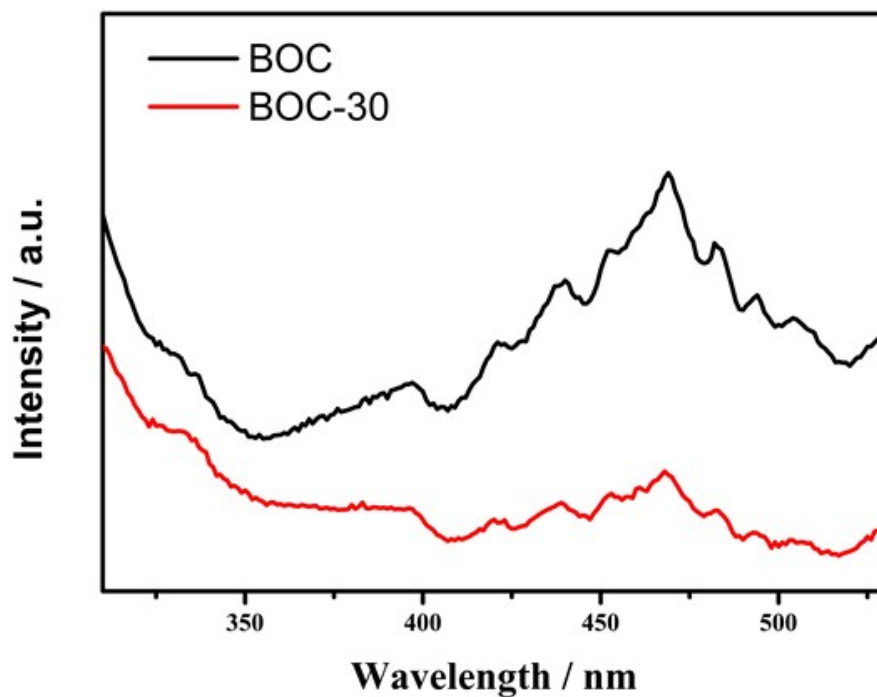

**Figure S1.** Photoluminescence spectra (PL) of BOC and BOC-30 samples.

## Tables:

**Table S1.** The  $S_{\text{BET}}$ , pore volume, peak diameter, and NO removal ratio of as-prepared samples.

| Sample name | $S_{\text{BET}}$<br>( $\text{m}^2/\text{g}$ ) | Pore<br>volume( $\text{cm}^3/\text{g}$ ) | Peak<br>diameter(nm) | NO<br>$\eta$ (%) |
|-------------|-----------------------------------------------|------------------------------------------|----------------------|------------------|
| BOC         | 4.77                                          | 0.01                                     | 9.00                 | 11.76            |
| BOC-10      | 6.45                                          | 0.02                                     | 12.61                | 24.13            |
| BOC-30      | 7.29                                          | 0.04                                     | 18.18                | 36.78            |
| BOC-50      | 6.80                                          | 0.02                                     | 12.40                | 31.82            |

## REFERENCES

- (1) Cui, W.; Li, J. Y.; Dong, F.; Sun, Y. J.; Jiang, G. M.; Cen, W. L.; Lee, S. C.; Wulle, Z. B. Highly Efficient Performance and Conversion Pathway of Photocatalytic NO Oxidation on SrO-Clusters@Amorphous Carbon Nitride. *Environ. Sci. Technol.* **2017**, 51, 10682-10690.
- (2) Zhao, Z.W.; Zhang, W.D.; Sun, Y.J.; Yu, J.Y.; Zhang, Y.X.; Wang, H.; Dong, F.; Wu, Z.B. Bi Cocatalyst/Bi<sub>2</sub>MoO<sub>6</sub> microspheres nanohybrid with SPR-promoted visible-light photocatalysis. *J. Phys. Chem.C* **2016**, 120, 11889-11898..
